# Supplementary material for: Extremely rapid engineering of zinc oxide nanoaggregates with structure-dependent catalytic capability towards removal of ciprofloxacin antibiotic
Source: Royal Society of Chemistry journal article supplement (doi:10.1039/c8qi00435h), 2018-01-01
Supplement: c8qi00435h1.pdf [file c8qi00435h1.pdf]

## Supplementary Information

### **Extremely rapid engineering of zinc oxide nanoaggregates with structure-dependent catalysis capability towards removal of ciprofloxacin antibiotic**

Jinyan Xiong <sup>a, d</sup>, Wei Li <sup>a, \*</sup>, Yixin Gan <sup>b</sup>, Yi Wei <sup>b</sup>, Gang Cheng <sup>b, \*</sup>, Shixue Dou <sup>d</sup>, Zhen Li <sup>c, d \*</sup>

<sup>a</sup> College of Chemistry and Chemical Engineering, Hubei Key Laboratory of Biomass Fibers and Eco-dyeing & Finishing, Wuhan Textile University, Wuhan 430073, China

<sup>b</sup> School of Chemistry and Environmental Engineering, Wuhan Institute of Technology, Xiongchu Avenue, Wuhan 430073, PR China

<sup>c</sup> State Key Laboratory of Radiation Medicine and Protection, School of Radiation Medicine and Radiation Protection, Collaborative Innovation Center of Radiation Medicine of Jiangsu Higher Education Institutions, Soochow University, 199 Ren Ai Road, Suzhou Industrial Park, Suzhou 215123, China.

<sup>d</sup> Institute for Superconducting & Electronic Materials, The University of Wollongong, NSW 2500, Australia.

Figure S1

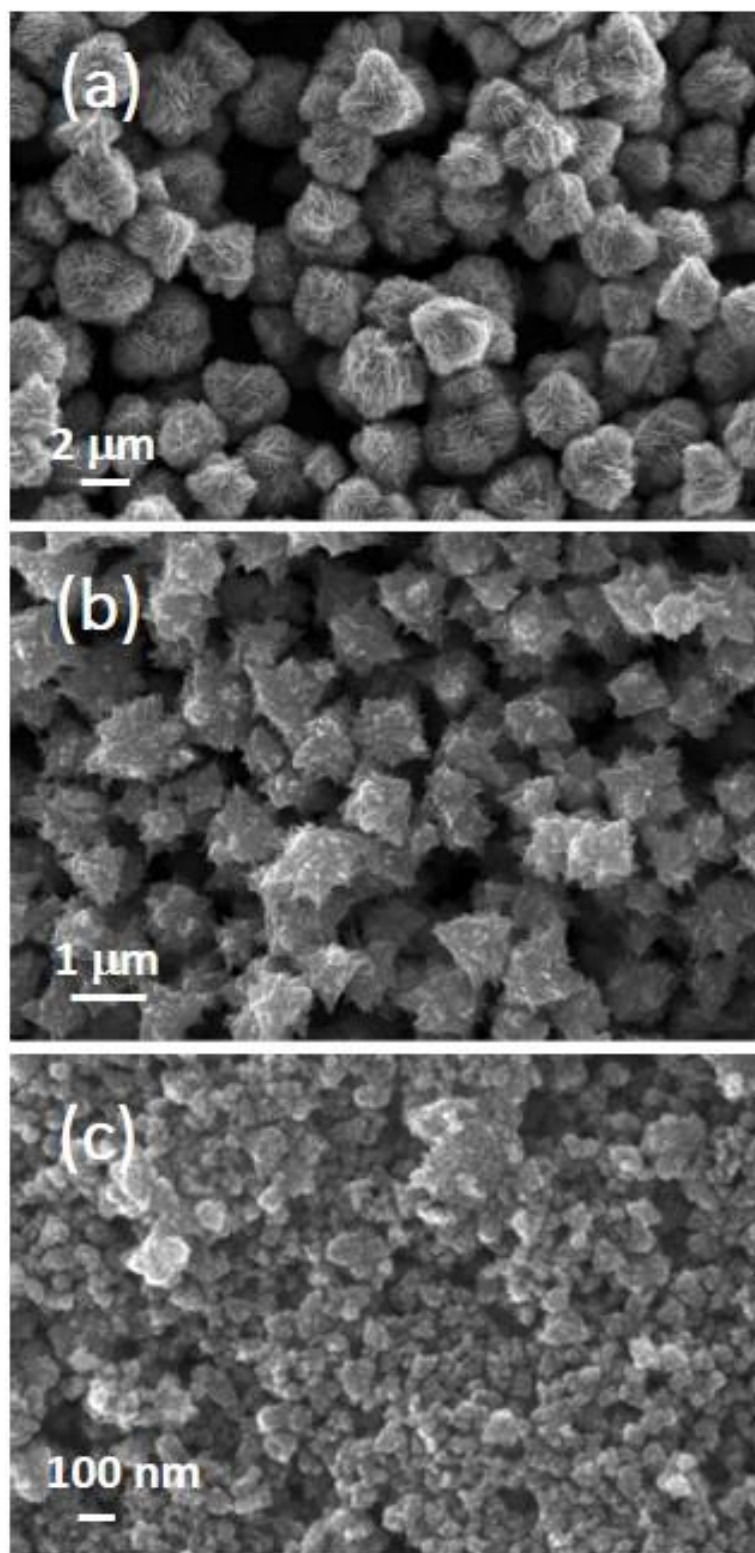

**Figure S1.** Low magnification SEM images of the as-synthesized products in EG-H<sub>2</sub>O with different volume ration: (b) 10:30, (c) 20:20, (d) 30:10.

Figure S2

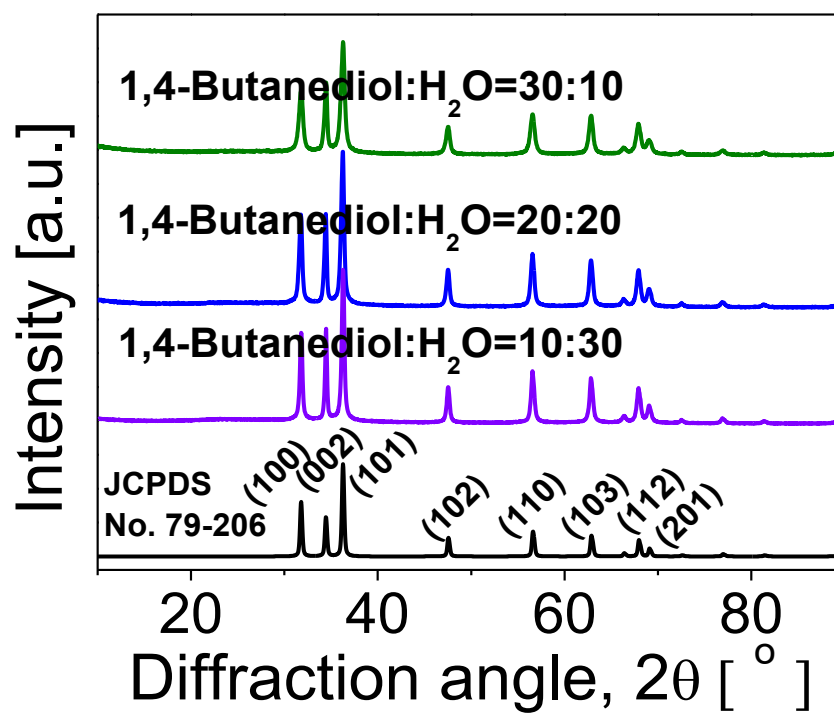

**Figure S2.** XRD patterns of the as-synthesized products in 1,4-Butanediol-H<sub>2</sub>O with different volume ratios.

Figure S3

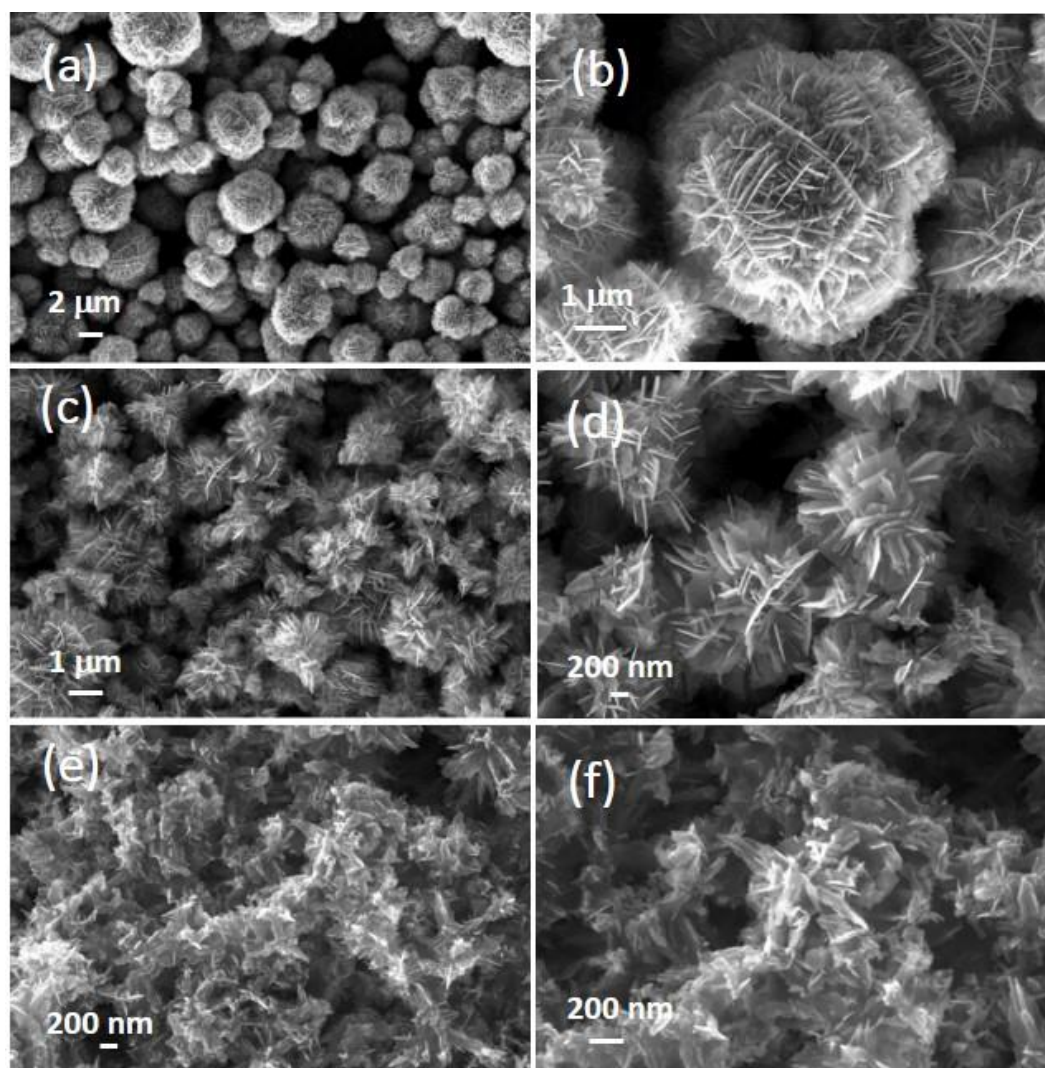

**Figure S3.** SEM images of the as-synthesized products in 1,4-Butanediol-H<sub>2</sub>O with different volume ratios: (a-b) 10:30, (c-d) 20:20, (e-f) 30:10.

Figure S4

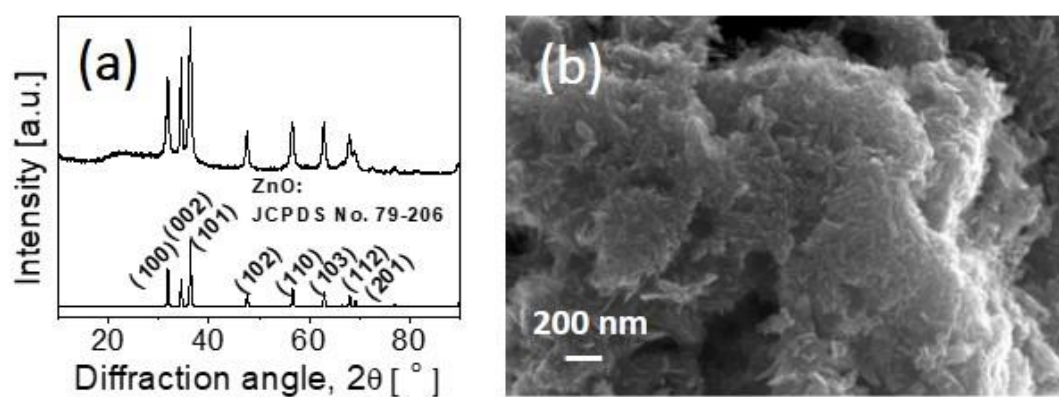

**Figure S4.** (a) XRD pattern and (b) SEM images of the as-synthesized products in dimethyl sulfoxide (DMSO)-H<sub>2</sub>O with volume ratio of 20:20.

Figure S5

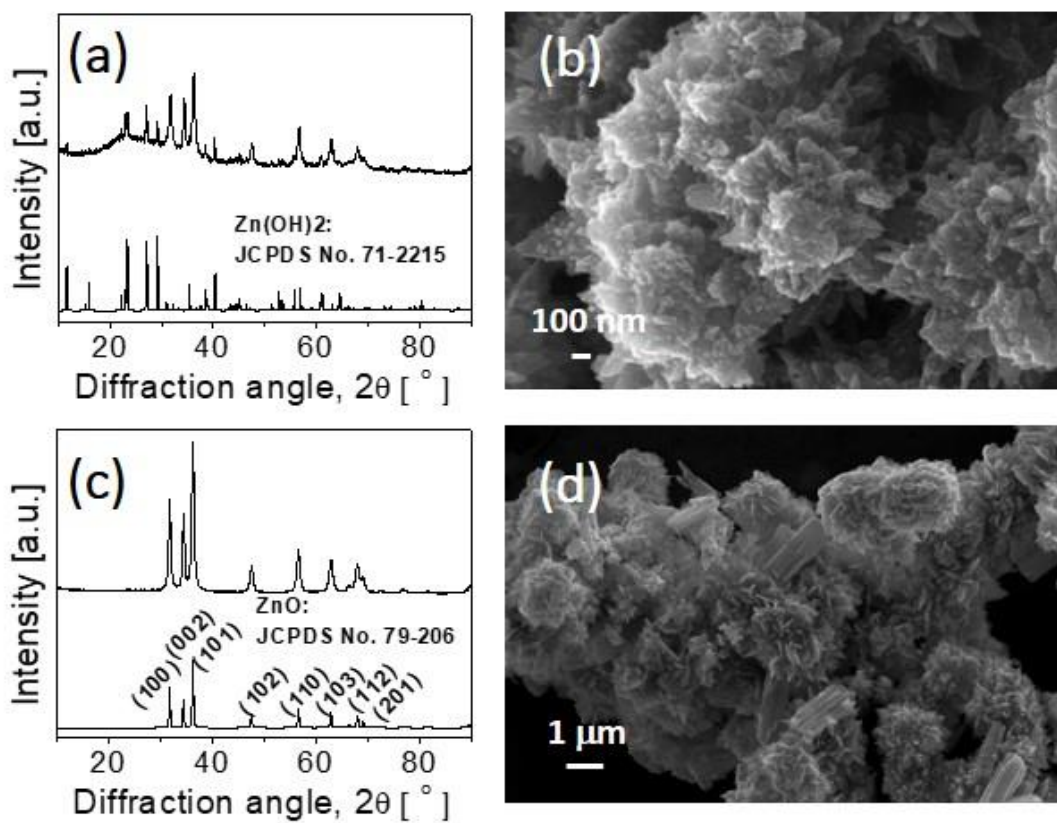

**Figure S5.** (a) XRD pattern and (b) SEM images of the as-synthesized products in acetone-H<sub>2</sub>O with volume ratio of 20:20; (c) XRD pattern and (d) SEM images of the products through calcination treatment (at 450 °C for 2h) with the sample prepared in in acetone-H<sub>2</sub>O with volume ratio of 20:20.

Figure S6

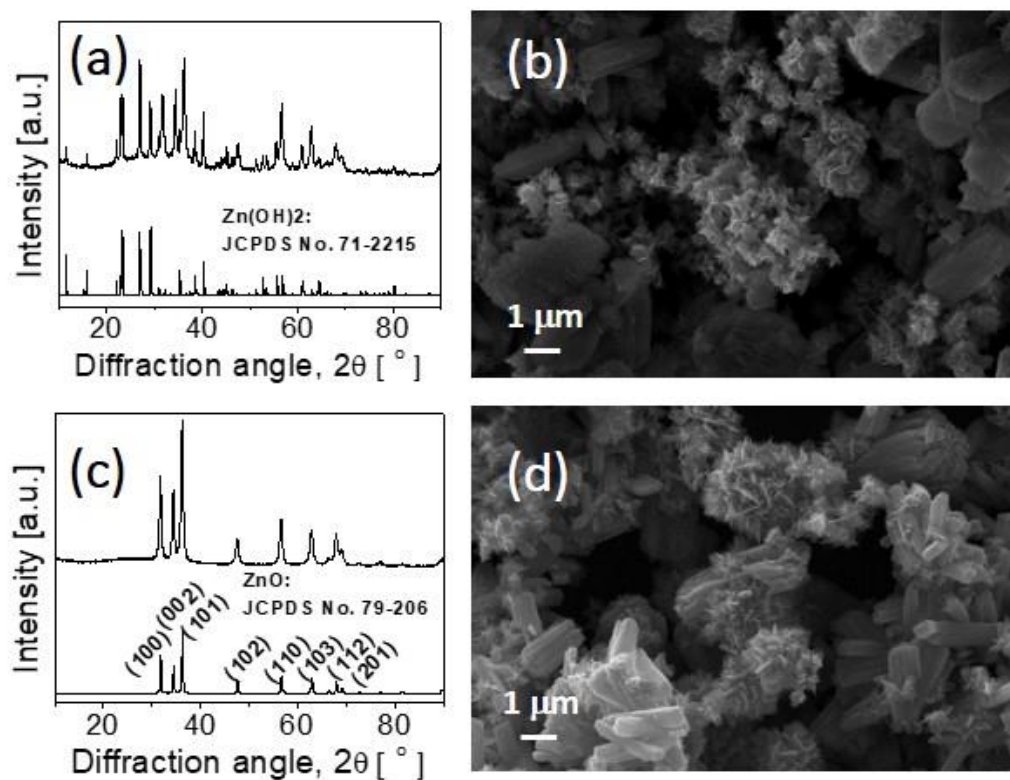

**Figure S6.** (a) XRD pattern and (b) SEM images of the as-synthesized products in propanol-H<sub>2</sub>O with volume ratio of 20:20; (c) XRD pattern and (d) SEM images of the products through calcination treatment (at 450 °C for 2h) with the sample prepared in in propanol-H<sub>2</sub>O with volume ratio of 20:20.



Figure S7

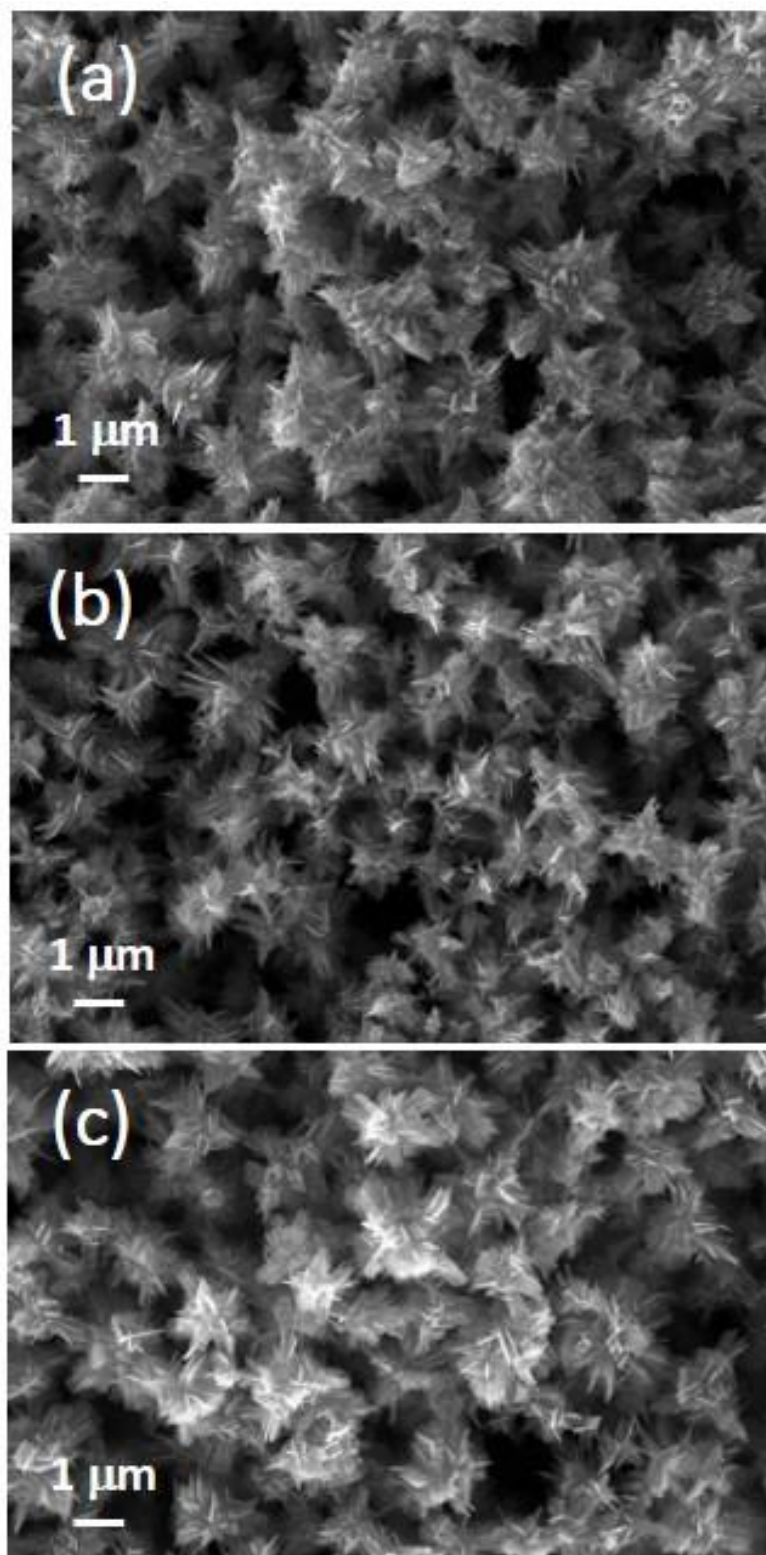

**Figure S7.** Low magnification SEM images of the as-synthesized products in polyol-H<sub>2</sub>O with volume ratio of 20:20: (a) DEG, (b) TEG, and (c) TTEG.



Figure S8

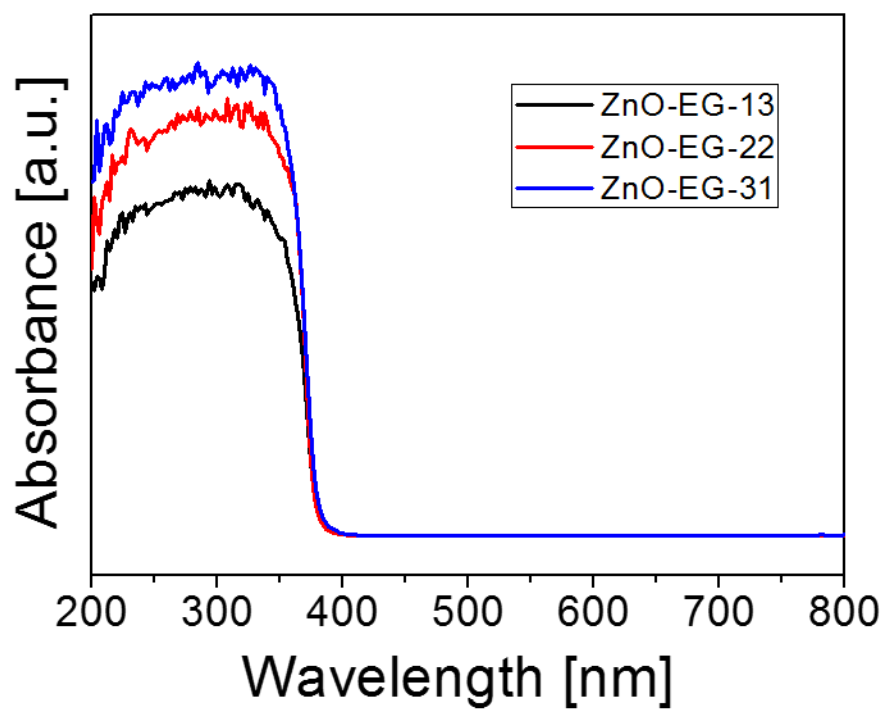

**Figure S8.** UV-vis diffuse reflectance spectra (DRS) of the as-synthesized products in EG-H<sub>2</sub>O with different volume ration: (b) 10:30 (**ZnO-EG-13**), (c) 20:20 (**ZnO-EG-22**), (d) 30:10(**ZnO-EG-31**).
